# Supplementary material for: Epigenetic drug screening for trophoblast syncytialization reveals a novel role for MLL1 in regulating fetoplacental growth
Source: PubMed Central journal article supplement (PMC10845764; doi:10.1186/s12916-024-03264-8), 2024-02-05

# Additional File 3: Original blot images.

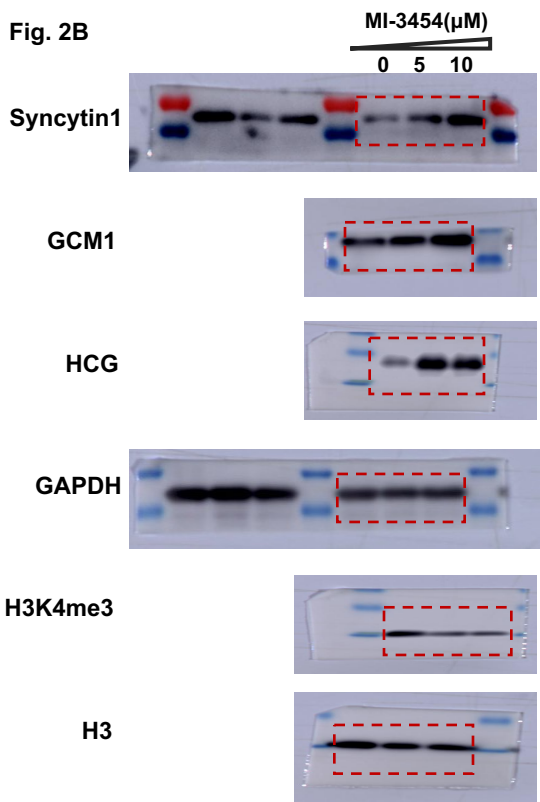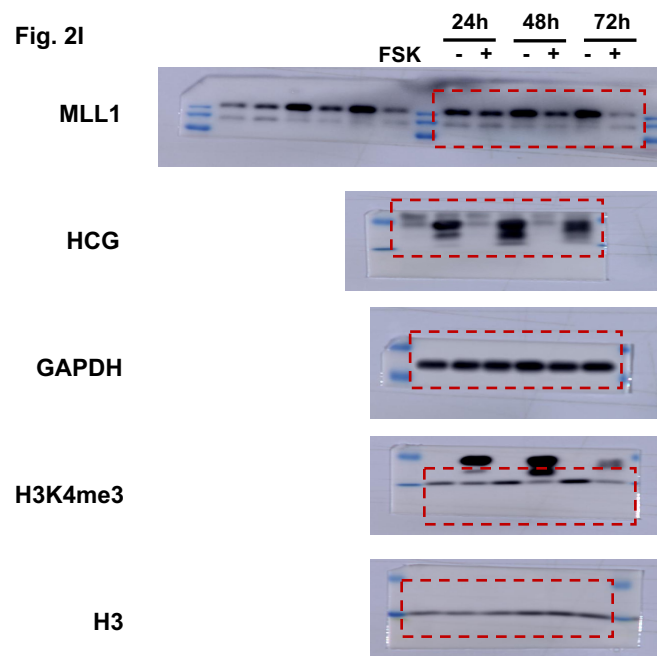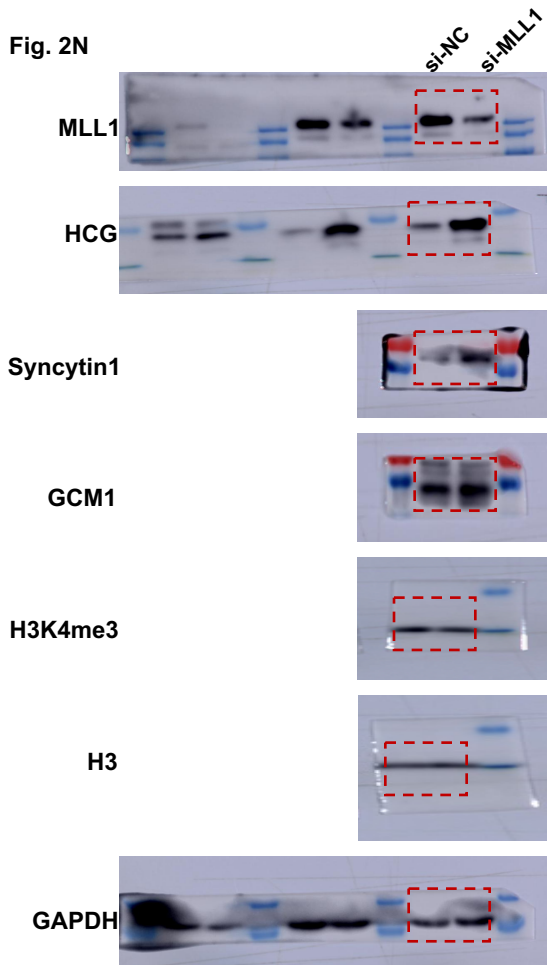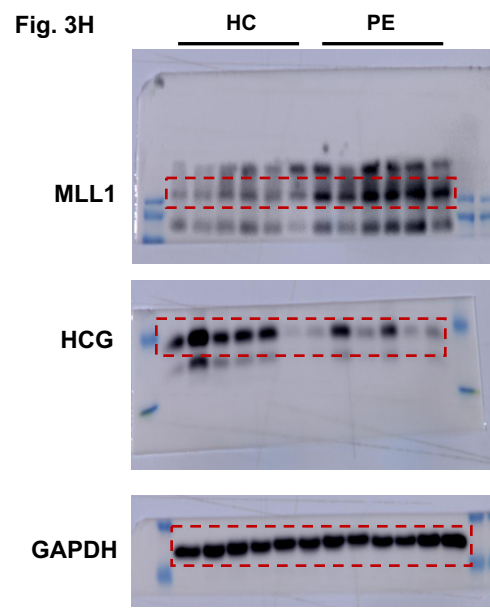

Fig. 5G

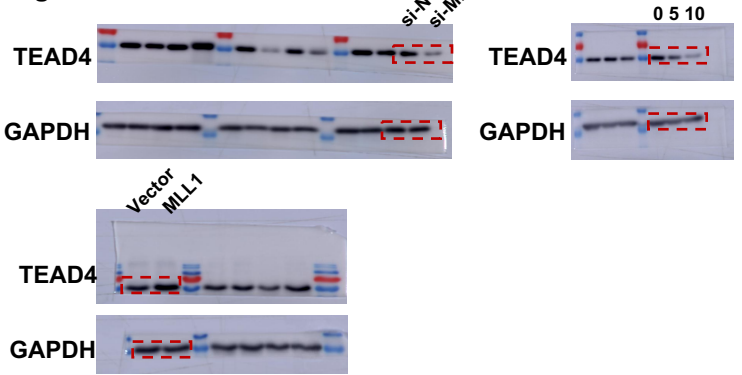

Fig. 5L

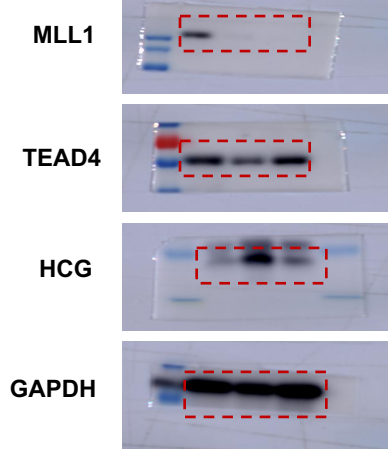

Fig. 6C

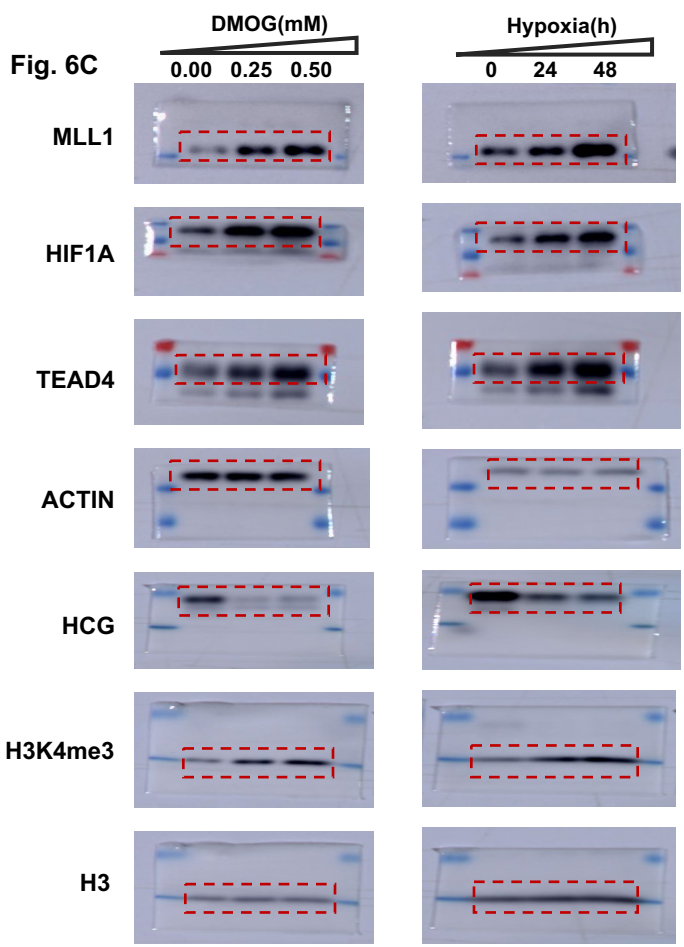

Fig. 6I

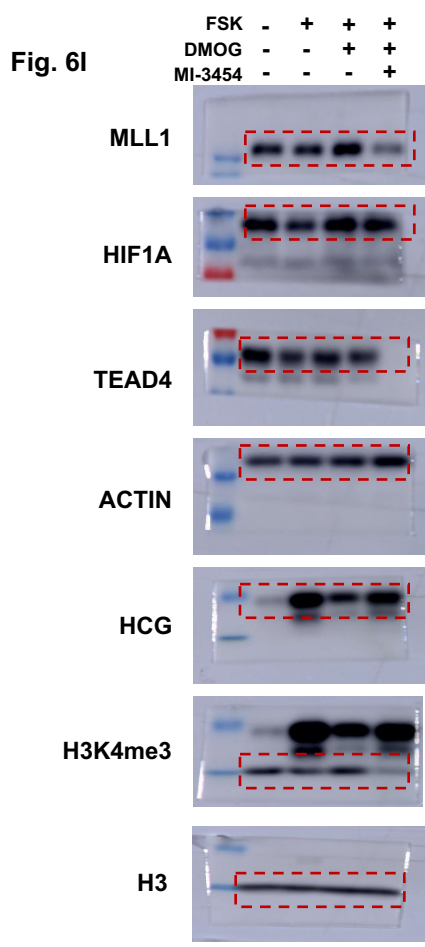

Fig. 7D

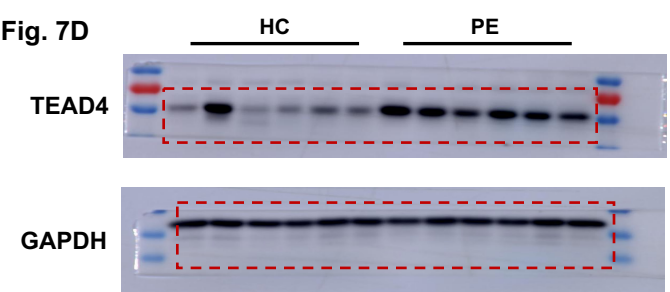

Fig. 7H

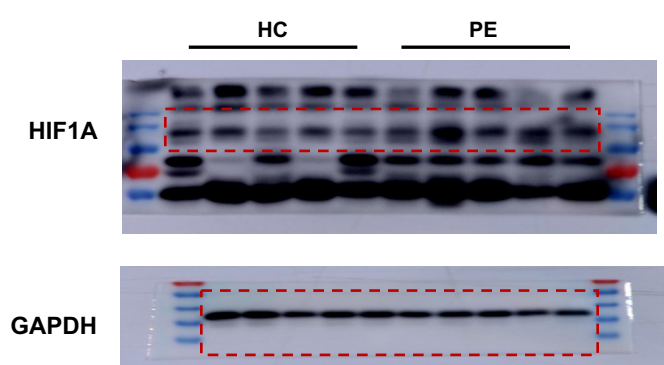

Fig. 8H

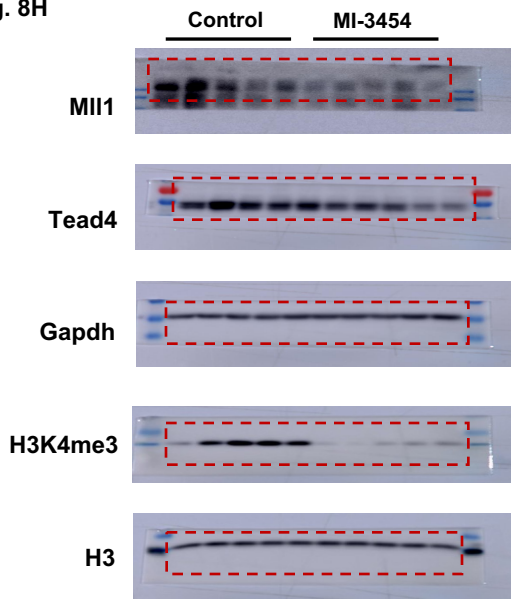

Fig. S2E

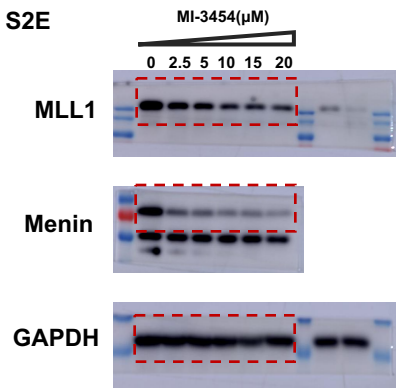

Fig. S3G

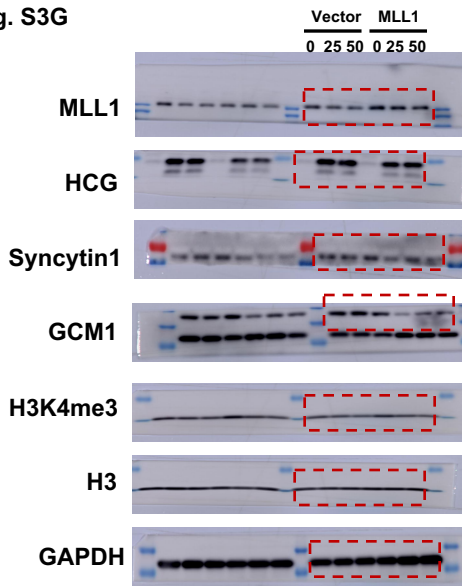

Fig. S3B

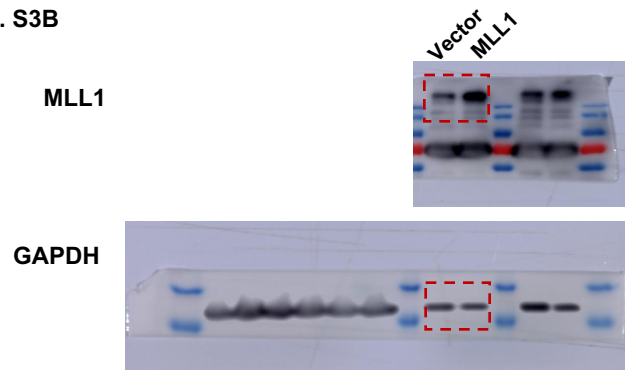

Fig. S6E

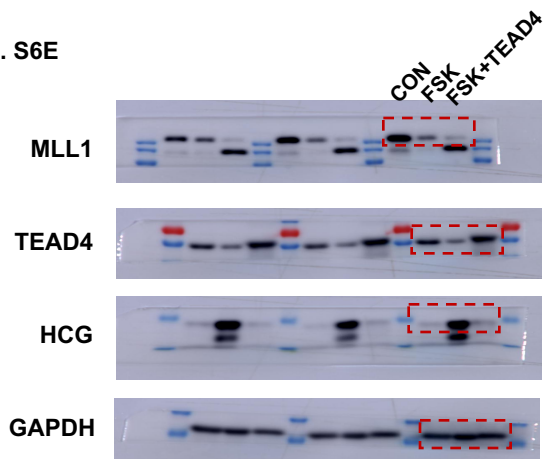

Supplement: 12916_2024_3264_MOESM3_ESM.pdf [file 12916_2024_3264_MOESM3_ESM.pdf]
